# Supplementary material for: Induction of embryogenic development in haploid microspore stem cells in droplet-based microfluidics
Source: Royal Society of Chemistry journal article supplement (doi:10.1039/d2lc00788f), 2022-01-01
Supplement: d2lc00788f1.pdf [file d2lc00788f1.pdf]

## Supplementary data

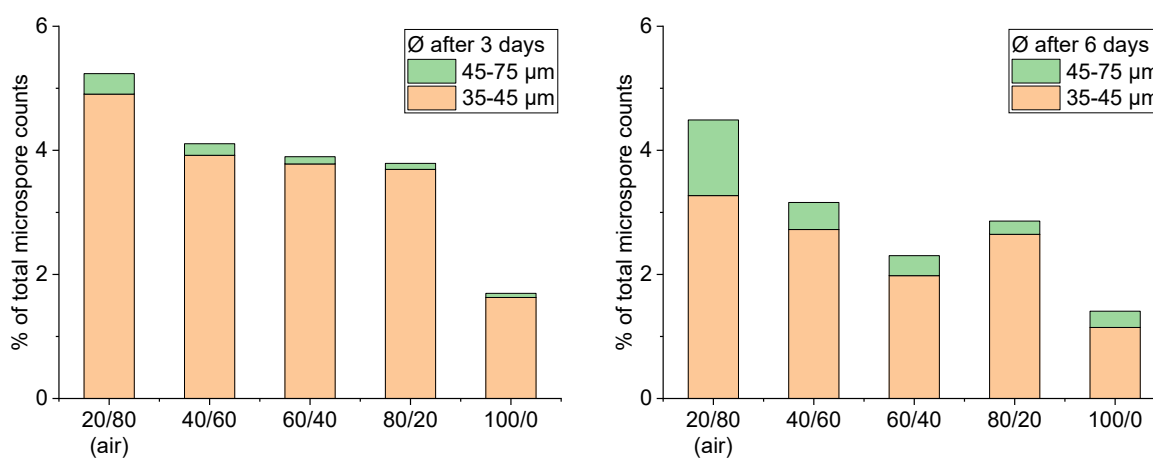

Fig. S1. Influence of different oxygen atmospheres on the growth behavior of microspores of *Brassica napus*. Microspores in microfluidic segments were incubated in PTFE tubes (ID 0.5 mm/AD 1.0 mm) under atmospheres with different oxygen contents. At a density of approximately 50 microspores/droplet, the size distribution of microspores in the total microspore number were determined after 3 (left) or 6 days (right). Lower selection range 35-45 μm (orange, first division steps), upper selection range 45-75 μm (green, further division steps until largest detected microspore); X-axis: O<sub>2</sub>/N<sub>2</sub> in percent.

The graphs show a section of the overall size distribution of microspores incubated in 120 nL microfluidic segments after 3 days (left) and after 6 days (right). The X axis shows the five different artificially generated atmospheres with the ratio of oxygen to nitrogen and the Y axis shows the percentage of microspores larger than 35 μm of the total microspore content of the respective batch. After 3 days, a clear, continuous trend can already be seen in the diagram. The highest proportion of microspores larger than 35 μm in the total microspore count was reached at around 5.2% under normal air conditions. This is followed by a downward trend from 40% to 100% oxygen with proportions of 4.1, 3.9, 3.8 and 1.7%. From the third to the sixth day of cultivation, the percentage of very large microspores (>45 μm) increases, and the percentage was by far the largest at 20% oxygen. The observed trend also continues in the obtained embryo ratios, which are shown in Table S1.

Tab. S1: Embryo rate under different oxygen atmospheres. Shown are five different ratios of O<sub>2</sub>/N<sub>2</sub>, the corresponding embryo numbers with the respective total number of microspores of *Brassica napus* and the embryo rate calculated in percent.

| ratio O <sub>2</sub> /N <sub>2</sub> | number of embryos (total number of microspores) | embryo rate |
|--------------------------------------|-------------------------------------------------|-------------|
| 20/80 (Luft)                         | 4 (6990)                                        | 0,057 %     |
| 40/60                                | 1 (4821)                                        | 0,021 %     |
| 60/40                                |                                                 |             |
| 80/20                                |                                                 | no embryos  |
| 100/0                                |                                                 |             |

The results clearly show that the microspores require an oxygen content of about 20 %, as found in the ambient air, for the best development inside droplets. This in turn means that the PTFE tubing used here has sufficient gas permeability.
